# Supplementary material for: Characterization of bacterial community shift in human Ulcerative Colitis patients revealed by Illumina based 16S rRNA gene amplicon sequencing
Source: Gut Pathog. 2014 Jun 14;6:22. doi: 10.1186/1757-4749-6-22 (PMC4094692; doi:10.1186/1757-4749-6-22)
Supplement: Additional file 1: Table S1 — Distribution of 26 families (P< 0.05) with average reference OTUs between two inflammatory stages. [file 1757-4749-6-22-S1.xls]

## Sheet: Sheet1
Sr.No	Family Name	P Value	Average number of OTUs between inflammatory stages
			Acute	Chronic
1	Bifidobacteriaceae	0.03368	1002.75	123.5
2	Paraprevotellaceae	0.01377	142.5	5.5
3	Acetobacteraceae	0.03609	37.25	0
4	Deinococcaceae	0.02098	182	1
5	Fusobacteriaceae	0.05431	266.25	0.5
6	Leptotrichiaceae	0.05128	80.25	0.5
7	Lactobacillaceae	0.0347	873.25	6.5
8	Propionibacteriaceae	0.0182	652.75	5
9	Actinomycetaceae	0.04648	90.25	0.5
10	Dermabacteraceae	0.01715	119.5	0
11	Enterococcaceae	0.04343	35.5	8.5	P < 0.05
12	Erysipelotrichaceae	0.02555	83.75	2	Obligate anaerobes
13	Rhodobacteraceae	0.00777	315	6	Facultative anaerobes
14	Rhodospirillaceae	0.01909	22.75	0.5	Aerobes
15	Campylobacteraceae	0.04665	58.25	1.5
16	Comamonadaceae	0.03214	594	3
17	Cytophagaceae	0.01449	68.5	2
18	Intrasporangiaceae	0.00111	45.75	0.5
19	Methylobacteriaceae	0.01394	652.5	3
20	Moraxellaceae	0.04595	1028.5	13.5
21	Neisseriaceae	0.03314	22.5	0.5
22	Nocardiaceae	0.00879	15	1.5
23	Oxalobacteraceae	0.03274	45.5	0.5
24	Sphingomonadaceae	0.04917	1439.75	11
25	Streptomycetaceae	0.04831	36.25	1
26	Flavobacteriaceae	0.04924	246.25	16
Table S1: Distribution of 26 families (P< 0.05) with average reference OTUs between two inflammatory stages.
