# Supplementary material for: Characterization of bacterial community shift in human Ulcerative Colitis patients revealed by Illumina based 16S rRNA gene amplicon sequencing
Source: Gut Pathog. 2014 Jun 14;6:22. doi: 10.1186/1757-4749-6-22 (PMC4094692; doi:10.1186/1757-4749-6-22)
Supplement: Additional file 2: Table S2 — Average OTU Abundance observed at family level between two inflammatory stages. [file 1757-4749-6-22-S2.xls]

## Sheet: Sheet1
Sr.No	Family Name	P value	Average number of OTUs between two inflammatory groups
			Acute	Chronic
1	Bacteroidaceae	0.205692	2952.5	12244.5
2	Clostridiaceae	0.179585	1684	9.5
3	Prevotellaceae	0.179023	13846.2	1126
4	Ruminococcaceae	0.0795387	1077.25	28
5	Veillonellaceae	0.141521	4359.75	744
6	Peptostreptococcaceae	0.166842	161	0
7	Tissierellaceae	0.0673317	211.75	11
8	Carnobacteriaceae	0.087132	70.75	0
9	Chitinophagaceae	0.167484	182.25	10.5
10	Coriobacteriaceae	0.0755037	415.75	23
11	Leuconostocaceae	0.185181	173.75	0.5
12	Porphyromonadaceae	0.434949	244.75	277
13	Rikenellaceae	0.321552	34	87.5
14	Desulfovibrionaceae	0.306059	8.25	22.5
15	Aerococcaceae	0.140993	36.25	0
16	Aeromonadaceae	0.0886505	96.75	0
17	Bacillaceae	0.0882786	3652.75	23	Obligate_anaerobes
18	Chromatiaceae	0.128874	97.25	0.5	Facultative_anaerobes
19	Weeksellaceae	0.218464	6792	969.5	Aerobes
20	Corynebacteriaceae	0.106655	1233.75	4
21	Enterobacteriaceae	0.275316	17801.5	80706
22	Gemellaceae	0.0915984	261.75	0
23	Helicobacteraceae	0.0796935	42.5	0.5
24	Micromonosporaceae	0.12357	73	0.5
25	Pasteurellaceae	0.490533	3072.75	2978.5
26	Sphingobacteriaceae	0.194983	4002	544.5
27	Staphylococcaceae	0.147753	1079.5	2.5
28	Streptococcaceae	0.156378	4590.25	1513
29	Alcaligenaceae	0.290874	2510.25	10397.5
30	Brevibacteriaceae	0.476065	217.25	1.5
31	Caulobacteraceae	0.0739826	288	2
32	Hyphomicrobiaceae	0.273059	99	727.5
33	Lachnospiraceae	0.104204	5628.75	109.5
34	Microbacteriaceae	0.171432	35083	45
35	Micrococcaceae	0.0753019	4321.25	7
36	Mycobacteriaceae	0.102873	971.75	0
37	Paenibacillaceae	0.101507	257.75	3
38	Pelagibacteraceae	0.144891	63.75	2.5
39	Pseudomonadaceae	0.34202	12362.8	25865
40	Verrucomicrobiaceae	0.206656	796.5	56
41	Xanthomonadaceae	0.28018	6763.25	38394
Table S2	Average OTU Abundance observed at family level between two inflammatory stages
